# Supplementary material
Source: PubMed Central journal article supplement (PMC6777808)
Supplement: jciinsight-4-127902-s064.pdf [file jciinsight-4-127902-s064.pdf]

**SUPPLEMENTARY MATERIAL FOR: Human PNPLA3-I148M variant increases hepatic retention of polyunsaturated fatty acids**

*Panu K. Luukkonen<sup>1,2,\*</sup>, Auli Nick<sup>1,3\*</sup>, Maarit Hölttä-Vuori<sup>1,3</sup>, Christoph Thiele<sup>4</sup>, Elina Isokuortti<sup>1,2</sup>, Susanna Lallukka-Brück<sup>1,2</sup>, You Zhou<sup>1,5,6</sup>, Antti Hakkarainen<sup>7,8</sup>, Nina Lundbom<sup>7</sup>, Markku Peltonen<sup>9</sup>, Marju Orho-Melander<sup>10</sup>, Matej Orešič<sup>11,12</sup>, Tuulia Hyötyläinen<sup>13</sup>, Leanne Hodson<sup>14</sup>, Elina Ikonen<sup>1,3,\*\*,§</sup>, Hannele Yki-Järvinen<sup>1,2,\*\*,§</sup>*

<sup>1</sup>Minerva Foundation Institute for Medical Research, Helsinki, Finland, <sup>2</sup>Department of Medicine, University of Helsinki and Helsinki University Hospital, Helsinki, Finland, <sup>3</sup>Faculty of Medicine, Department of Anatomy, University of Helsinki, Helsinki, Finland, <sup>4</sup>LIMES Institute, Bonn University, Bonn, Germany, <sup>5</sup>Systems Immunity Research Institute, Cardiff University, Cardiff, UK, <sup>6</sup>Division of Infection and Immunity, Cardiff University School of Medicine, Cardiff, UK, <sup>7</sup>Department of Radiology, HUS Medical Imaging Center, Helsinki University Hospital and University of Helsinki, Helsinki, Finland, <sup>8</sup>Department of Neuroscience and Biomedical Engineering, Aalto University School of Science, Espoo, Finland, <sup>9</sup>Department of Public Health Solutions, National Institute for Health and Welfare, Helsinki, Finland, <sup>10</sup>Department of Clinical Sciences, Lund University, Malmö, Sweden, <sup>11</sup>Turku Centre for Biotechnology, University of Turku and Åbo Akademi University, Turku, Finland, <sup>12</sup>School of Medical Sciences, Örebro University, Örebro, Sweden, <sup>13</sup>Department of Chemistry, Örebro University, Örebro, Sweden, <sup>14</sup>Oxford Centre for Diabetes, Endocrinology and Metabolism, University of Oxford, Oxford, UK, \*Authors share co-first authorship, \*\*Authors share co-last authorship, § Corresponding Author.

## LIPIDOMIC ANALYSIS

### Sample preparation and chemicals

All solvents were HPLC grade or LC-MS grade, from Honeywell (Morris Plains, NJ, USA), Fisher Scientific (Waltham, MA, USA) or Sigma-Aldrich (St. Louis, MO, USA). Mass spectrometry grade ammonium acetate and reagent grade formic acid were purchased from Sigma-Aldrich (St. Louis, MO, USA).

Samples were extracted in random order as follows: 10  $\mu\text{L}$  of 0.9% NaCl and, 120  $\mu\text{L}$  of  $\text{CHCl}_3$ : MeOH (2:1, v/v) containing internal standards ( $c=2.5 \mu\text{g mL}^{-1}$ ) were added to 10  $\mu\text{L}$  of each plasma sample. The standard solution contained the following compounds: 1,2-diheptadecanoyl-sn-glycero-3-phosphoethanolamine (PE(17:0/17:0)), N-heptadecanoyl-D-erythro-sphingosylphosphorylcholine (SM(d18:1/17:0)), N-heptadecanoyl-D-erythro-sphingosine (Cer(d18:1/17:0)), 1,2-diheptadecanoyl-sn-glycero-3-phosphocholine (PC(17:0/17:0)), 1-heptadecanoyl-2-hydroxy-sn-glycero-3-phosphocholine (LPC(17:0)) and 1-palmitoyl-d31-2-oleoyl-sn-glycero-3-phosphocholine (PC(16:0/d31/18:1)), purchased from Avanti Polar Lipids, Inc. (Alabaster, AL, USA), and tripalmitin- Triheptadecanoylglycerol (TG(17:0/17:0/17:0)) Larodan AB, Solna, Sweden). The samples were vortex mixed and incubated on ice for 30 min after which they were centrifuged ( $9400 \times g$ , 3 min). 60  $\mu\text{L}$  from the lower layer of each sample was then transferred to a glass vial with an insert and 60  $\mu\text{L}$  of  $\text{CHCl}_3$ : MeOH (2:1, v/v) was added to each sample. The samples were re-randomized and stored at  $-80^\circ\text{C}$  until analysis.

Calibration curves using 1-hexadecyl-2-(9Z-octadecenoyl)-sn-glycero-3-phosphocholine (PC(16:0e/18:1(9Z))), 1-(1Z-octadecenyl)-2-(9Z-octadecenoyl)-sn-glycero-3-phosphocholine (PC(16:0/16:0)), 1-octadecanoyl-sn-glycero-3-phosphocholine (LPC(18:0)), (LPC18:1), 1-2-dioleoyl-sn-glycerol ((DG(18:1/18:1)), (2-aminoethoxy)[(2R)-3-hydroxy-2-[(11Z)-octadec-11-enoyloxy]propoxy]phosphinic acid (LysoPE(18:1)), N-(9Z-octadecenoyl)-sphinganine (Cer

(d18:0/18:1(9Z))), 1-hexadecyl-2-(9Z-octadecenoyl)-sn-glycero-3-phosphoethanolamine (PE (16:0/18:1)) and 1-octadecanoyl-2-(5Z,8Z,11Z,14Z-eicosatetraenoyl)-sn-glycero-3-phospho-(1'-myo-inositol)n (PI(18:0-20:4)) from Avanti Polar Lipids, Inc., 1-Palmitoyl-2-Hydroxy-sn-Glycero-3-Phosphatidylcholine (LPC(16:0)) from Larodan, and 1,2,3 trihexadecanoalglycerol (TG16:0/16:0/16:0)), 1,2,3 trioctadecanoalglycerol (TG(18:0/18:0/18:0)) and cholest-5-en-3 $\beta$ -yl octadecanoate (ChoE(18:0)), 3 $\beta$ -Hydroxy-5-cholestene-3-linoleate (ChoE(18:2)) from Larodan, were prepared prepared to the following concentration levels: 100, 500, 1000, 1500, 2000 and 2500 ng mL<sup>-1</sup> (in CHCl<sub>3</sub>:MeOH, 2:1, v/v) including 250 ng mL<sup>-1</sup> of each internal standard.

### UHPLC-QTOFMS analysis

The UHPLC system used was 1290 Infinity system from Agilent Technologies (Santa Clara, CA, USA). The system was equipped with a multisampler (maintained at 10 °C) using 10% DCM in MeOH and ACN:MeOH:IPA:H<sub>2</sub>O (1:1:1:1, v/v/v/v) + 0.1% HCOOH as needle wash solutions after each injection for 7.5 s each, a quaternary solvent manager and a column thermostat (maintained at 50 °C). Separations were performed in a ACQUITY UPLC® BEH C18 column (2.1 mm × 100 mm, particle size 1.7  $\mu$ m) by Waters Corporation (Milford, MA, USA). The flow rate was 0.4 mL min<sup>-1</sup> and the injection volume was 1  $\mu$ L. H<sub>2</sub>O + 1% NH<sub>4</sub>Ac (1M) + 0.1% HCOOH (A) and ACN:IPA (1:1, v/v) + 1% NH<sub>4</sub>Ac + 0.1% HCOOH (B) were used as the mobile phases for the gradient elution. The gradient was as follows: from 0 to 2 min 35-80% B, from 2 to 7 min 80-100% B and from 7 to 14 min 100% B. Each run was followed by a 7 minute re-equilibration period under initial conditions (35% B).

The mass spectrometer used was a 6545 quadrupole time of flight (QTOF) instrument from Agilent Technologies (Santa Clara, CA, USA), interfaced with a dual jet stream electrospray (dual ESI) ion source. Nitrogen generated by a nitrogen generator (PEAK Scientific, UK) was used as the nebulizing

gas at a pressure of 21 psi, as the drying gas at a flow rate of 10 L min<sup>-1</sup> (at 193 °C) and as the sheath gas at a flow rate of 11 L min<sup>-1</sup> (at 379 °C). Pure nitrogen (6.0) from AGA (Munich, Bavaria, Germany.) was used as the collision gas. The capillary voltage and the nozzle voltage were kept at 3643 V and 1500 V, respectively. The reference mass solution including ions at m/z 121.0509 and 922.0098 was prepared according to instructions by Agilent. The acquisition mass range was m/z 100-1700 and the instrument was run using the extended dynamic range with an approximate resolution of 30 000 FWHM measured on the ion at m/z 1521.9715 (which is included in the tune mixture) during calibration of the instrument. MassHunter B.06.01 software (Agilent Technologies, Santa Clara, CA, USA) was used for all data acquisition and MZmine 2 was used for data processing.

MS data processing was performed using open source software MZmine 2.33. The following steps were applied in the processing: 1.) Mass detection with a noise level of 750, 2.) Chromatogram builder with a min time span of 0.08 min, min height of 800 and a m/z tolerance of 0.006 m/z or 10.0 ppm, 3.) Chromatogram deconvolution using the local minimum search algorithm with a 70% chromatographic threshold, 0.05 min minimum RT range, 1% minimum relative height, 800 minimum absolute height, a minimum ration of peak top/edge of 1.2 and a peak duration range of 0.08 - 5.0, 4.), Isotopic peak grouper with a m/z tolerance of 6.0 ppm, RT tolerance of 0.05 min, maximum charge of 2 and with the most intense isotope set as the representative isotope, 5.) Peak list row filter keeping only peak with a minimum of 10% of the samples in a row, 6.) Join aligner with a m/z tolerance of 0.008 or 10.0 ppm and a weight for of 2, a RT tolerance of 0.1 min and a weight of 1 and with no requirement of charge state or ID and no comparison of isotope pattern, 7.) Gap filling using the same RT and m/z range gap filler algorithm with an m/z tolerance of 0.008 or 10 ppm, 8.) Identification of lipids using a custom database search with an m/z tolerance of 0.006 009 m/z or 10.0 ppm and a RT tolerance of 0.1 min, 9.) Normalization using internal standards (PE (17:0/17:0), SM (d18:1/17:0), Cer (d18:1/17:0), LPC (17:0), TG (17:0/17:0/17:0) and PC (16:0/d30/18:1)) for

identified lipids and closest ISTD for the unknown lipids 10). The concentrations were calculated using lipid-class based concentration curves.

### **Generation of stable A431 cell lines expressing GFP-tagged PNPLA3-148I and PNPLA3-148M proteins**

GFP-PNPLA3-148I and GFP-PNPLA3-148M encoding PCR fragments were inserted into the pSH-EFIRE vector (kind gift from Shiqian Li) encoding a puromycin selection cassette, EF1alpha promoter and AAVS1 homology arms. The constructs were then transfected to A431 PNPLA3-ko cells for integration into the AAVS1/Safe Harbor locus, and the cells were cultured under puromycin selection (1 µg/ml).

## SUPPLEMENTAL FIGURES AND FIGURE LEGENDS

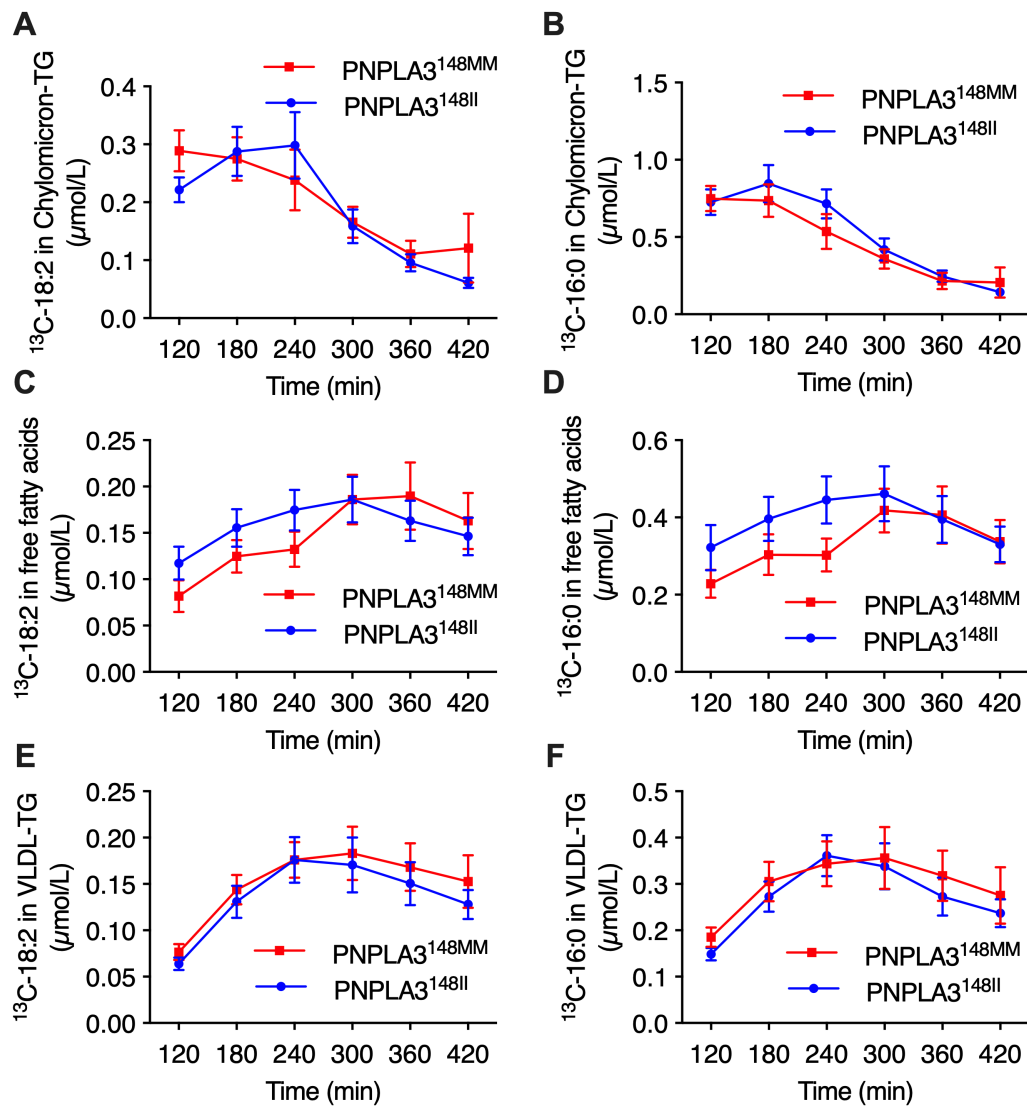

**Figure S1. Concentrations of  $^{13}\text{C}$ -labeled fatty acids in (A-B) plasma chylomicron-TG, (C-D) free fatty acids and (E-F) VLDL-TG in the PNPLA3<sup>148MM</sup> and PNPLA3<sup>148II</sup> groups during the postprandial period.** Data are shown as mean $\pm$ SEM. The blue lines and circles denote the PNPLA3<sup>148II</sup> (n=14) group and the red lines and squares the PNPLA3<sup>148MM</sup> (n=12) group. There were no significant differences between the groups as determined using 2-way ANOVA.

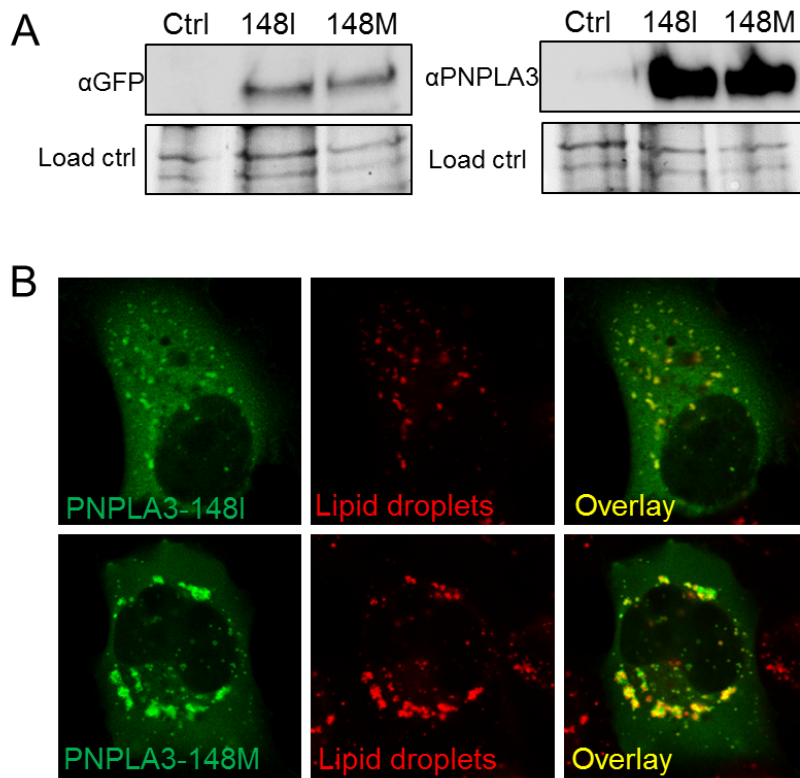

**Figure S2. Expression level and lipid droplet association of GFP-tagged PNPLA3-148I and PNPLA3-148M proteins in A431 cells.** (A) Western blotting of GFP-tagged PNPLA3-148I and PNPLA3-148M proteins stably expressed on PNPLA3-ko A431 cell background. Cell lysates (30  $\mu$ g protein) were immunoblotted using anti-GFP (Abcam ab290) or anti-PNPLA3 (Santa Cruz) antibodies. (B) PNPLA3-ko cells expressing GFP-tagged PNPLA3-148I or PNPLA3-148M proteins were incubated for 50 min with 200  $\mu$ M oleic acid, then fixed and stained with the lipid droplet dye LD540. Please note the more prominent localization of PNPLA3-148M on LDs compared to PNPLA3-148I.

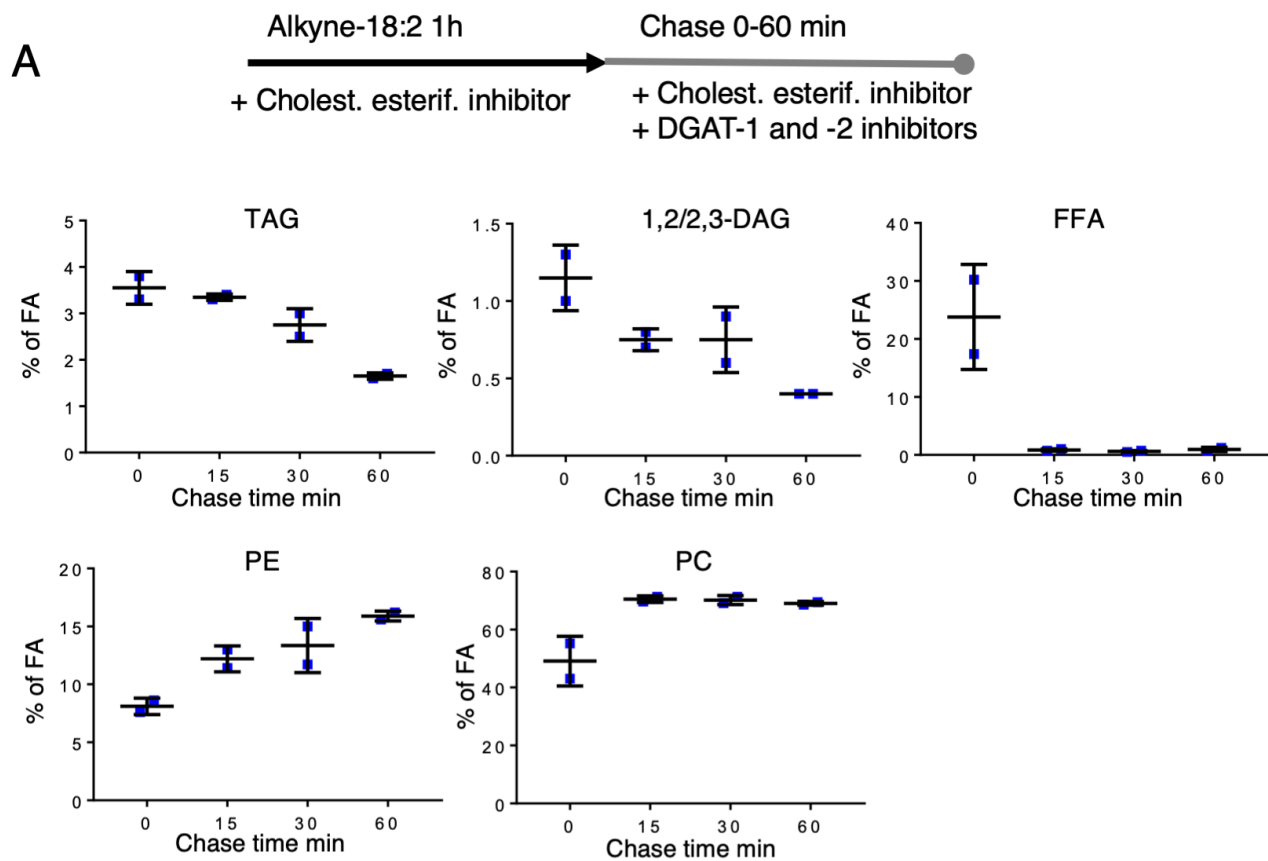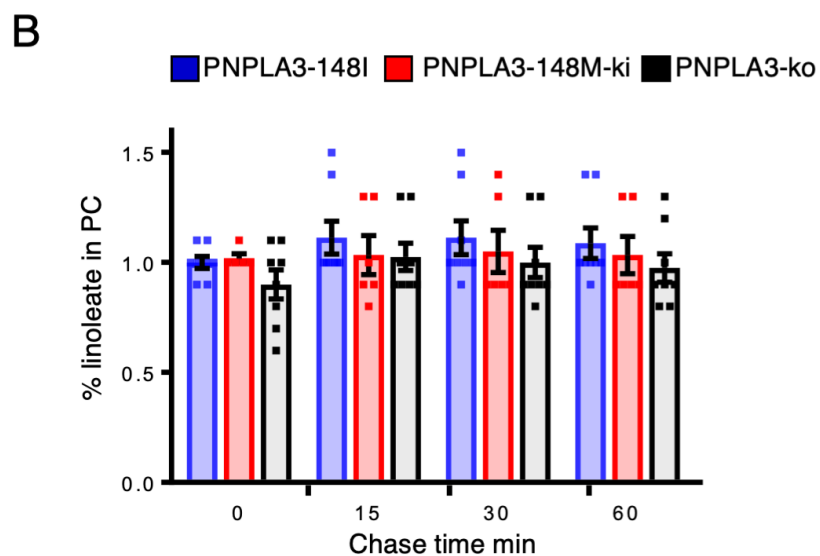

**Figure S3. Partitioning of alkyne-labeled linoleate in different lipid species in A431 cells during lipolysis.** (A) A431 PNPLA3-148I cells were labeled for 1h min with 100  $\mu$ M alkyne-linoleate in the presence of a cholesterol esterification inhibitor. After labeling, cells were either harvested (0 min chase) or further incubated in lipoprotein-deficient medium supplemented with cholesterol



esterification and DGAT inhibitors for the indicated times before collecting. Cells were extracted, click-reacted and analysed by TLC. Bars: % of alkyne-linoleate in indicated lipid species  $\pm$  SD, representative experiment in duplicate. (B) Homozygous PNPLA3-148I, PNPLA3-148M-ki and PNPLA3-ko A431 cells were labeled and incubated as in (A). Bars: % of incorporated alkyne-linoleate in PC, normalized to PNPLA3-148I cells at 0 min chase  $\pm$  SEM. N=5-8 from 3-4 individual experiments.

**Table S1. Physical activity measured using an accelerometer and dietary intake based on food record data of the PNPLA3<sup>148MM</sup> and PNPLA3<sup>148II</sup> groups.**

|                                    | PNPLA3 <sup>148II</sup> | PNPLA3 <sup>148MM</sup> |
|------------------------------------|-------------------------|-------------------------|
| <i>Accelerometer data</i>          |                         |                         |
| Accelerometer wear time (min/day)  | 773 (692 – 847)         | 799 (728 – 887)         |
| Steps (n/day)                      | 8957 (7220 – 9962)      | 8473 (4896 – 11023)     |
| Sedentariness (% of wear time)     | 58 (57 – 63)            | 64 (57 – 70)            |
| Light activity (% of wear time)    | 34 (29 – 38)            | 28 (26 – 40)            |
| Moderate activity (% of wear time) | 7 (5 – 8)               | 4 (2 – 10)              |
| Sitting time (min/day)             | 378 (310 – 486)         | 389 (323 – 546)         |
| Sitting periods >30min (n)         | 14 (11 – 19)            | 14 (10 – 36)            |
| <i>Food record data</i>            |                         |                         |
| Energy intake (kcal/day)           | 2000 (1611 – 2398)      | 2033 (1523 – 2220)      |
| Protein intake (E%)                | 16.6 (12.9 – 21.4)      | 17.1 (15.2 – 20.6)      |
| Carbohydrate intake (E%)           | 41.6 (34.0 – 50.3)      | 42.7 (37.3 – 44.7)      |
| Fat intake (E%)                    | 37.4 (32.8 – 45.1)      | 37.8 (32.5 – 39.5)      |
| Saturated fat intake (E%)          | 10.9 (9.7 – 16.0)       | 12.1 (10.5 – 14.1)      |
| Monounsaturated fat intake (E%)    | 12.8 (11.6 – 17.4)      | 13.9 (11.2 – 15.2)      |
| Polyunsaturated fat intake (E%)    | 7.0 (6.5 – 8.2)         | 6.7 (5.6 – 8.6)         |
| Total fibre intake (g/day)         | 20.9 (17.0 – 31.3)      | 19.3 (13.4 – 24.5)      |

Data are in median (25th-75th percentile). The differences in variables between the groups were compared using Mann Whitney U test. There were no significant differences in any variable. E%, energy percent.
